# Supplementary material for: LncRNA MSC-AS1 aggravates nasopharyngeal carcinoma progression by targeting miR-524-5p/nuclear receptor subfamily 4 group A member 2 (NR4A2)
Source: Cancer Cell Int. 2020 Apr 28;20:138. doi: 10.1186/s12935-020-01202-1 (PMC7189691; doi:10.1186/s12935-020-01202-1)
Supplement: Supplementary file 1 — Additional file 1: Table S1. Sequences for PCR primers and plasmids used in this study. [file 12935_2020_1202_MOESM1_ESM.xlsx]

## Sheet: Sheet1
Primers for PCR
MSC-AS1	F: AAGCAACAACTGTCTGGCCT
	R: TGATGCCAGCAAATTGGTGC
miR-524-5p	F: CUACAAAGGGAAGCACUUUCUC
	R: CTCTACAGCTATATTGCCAGCCAC
NR4A2	F: TCATCTCCTCAGACTGGGGG
	R: TGTACCAAATGCCCCTGTCC
GAPDH	F: CCACAGTCCATGCCATCAC
	R: CGTTCAGCTCAGGGATGAC
U6	F: CTCGCTTCGGCAGCACA
	R: AACGCTTCACGAATTTGCGT
Sequences for plasmids
sh-NC	CCGGCTGATAAAAAAAAATTTAAATCTCGAGATTTAAATTTTTTTTTATCAGTTTTTG
sh-MSC-AS1#1	CCGGCTGATACACATCAATTTAAATCTCGAGATTTAAATTGATGTGTATCAGTTTTTG
sh-MSC-AS1#2	CCGGCAGAAATTCAAGATGTAAATACTCGAGTATTTACATCTTGAATTTCTGTTTTTG
sh-NR4A2#1	CCGGCTGGTAGTTGTGCATCTGAATCTCGAGATTCAGATGCACAACTACCAGTTTTTG
sh-NR4A2#2	CCGGCTGAATGTCTTCTACCTTAATCTCGAGATTAAGGTAGAAGACATTCAGTTTTTG
NC mimic	CAAAAAACCGAAGCACUUUCUC
miR-524-5p mimic	CUACAAAGGGAAGCACUUUCUC
NC inhibitor	GAGAAAGTGCTTCGGTTTTTTG
miR-524-5p inhibitor	GAGAAAGTGCTTCCCTTTGTAG
